1  
2  
3  
4  
5  
6  
7  
8  
9  
10  
11  
12  
13  
14  
15  
16  
17  
18  
19  
20  
21  
22  
23  
24  
25  
26  
27  
28  
29  
30  
31  
32  
33  
34  
35  
36

Genomic Data from an Endangered Amphibian Reveal Unforeseen Consequences of Fragmentation by Roads

Evan McCartney-Melstad<sup>1\*</sup>, Jannet K. Vu<sup>1,2</sup>, H. Bradley Shaffer<sup>1</sup>

1: Department of Ecology and Evolutionary Biology, La Kretz Center for California Conservation Science, and Institute of Environmental Studies, University of California, Los Angeles

2: Department of Ecology and Evolution, Stony Brook University, New York

\* Corresponding author: [evanmelstad@ucla.edu](mailto:evanmelstad@ucla.edu)

37 **Abstract**

38 Roads fragment landscapes and can cause the loss of metapopulation dynamics in threatened  
39 species, but as relatively new landscape features, few studies have had the statistical power to  
40 genetically examine road effects. We used DNA sequence data from thousands of nuclear loci to  
41 characterize the population structure of New York-endangered Eastern tiger salamanders  
42 (*Ambystoma tigrinum*) on Long Island and quantify the impacts of roads on population  
43 fragmentation. We uncovered highly genetically structured populations over an extremely small  
44 spatial scale (approximately 40 km<sup>2</sup>) in an increasingly human-modified landscape. Geographic  
45 distance and the presence of roads between ponds are both strong predictors of genetic  
46 divergence, suggesting that both natural and anthropogenic factors are responsible for the  
47 observed patterns of genetic variation. Our study demonstrates the value of genomic approaches  
48 in molecular ecology, as these patterns did not emerge in an earlier study of the same system  
49 using microsatellite loci. Ponds supported small effective population sizes, and pond surface area  
50 showed a strong positive correlation with salamander population size. When combined with the  
51 high degree of structuring in this heavily modified landscape, our study indicates that these  
52 endangered amphibians require management at the individual pond, or pond cluster, level.  
53 Particular efforts should be made to preserve large vernal pools, which harbor the greatest  
54 genetic diversity, and their surrounding upland habitat. Contiguous upland landscapes between  
55 ponds that facilitate natural metapopulation connectivity and demographic rescue from future  
56 local extirpations should also be protected.

57 **Introduction**

58 Biological conservation often occurs at small spatial scales and in human dominated  
59 landscapes including the urban-wildland interface, agricultural habitat mosaics, and small urban  
60 parklands. Critical management questions frequently come down to the valuation of remnant

61 habitat patches, the impact of roads or other anthropogenic disturbances on those patches, and  
62 the viability of small, fragmented populations. Genetic, and, increasingly, genomic analyses  
63 constitute a powerful tool kit for conservation evaluation and action, particularly for secretive  
64 species such as reptiles and amphibians (Shaffer et al., 2015). When studying endangered  
65 species, conservationists often focus on the value of small protected populations or the impact of  
66 a road between nearby populations that historically exchanged migrants, tracking these changes  
67 over short temporal scales. As conservation and population biologists, we are generally most  
68 interested in dynamics across a few kilometers on specific landscapes, rather than the larger  
69 spatiotemporal scales spanning thousands of kilometers and generations that are typically the  
70 purview of population genetics.

71 Particularly for secretive, cryptic, low-vagility species, including amphibians, reptiles, small  
72 mammals, and many invertebrates that often move a kilometer or less per generation (Blaustein,  
73 Wake, & Sousa, 1994), acquiring the data needed for effective management and trend analysis is  
74 virtually impossible with traditional ecological methods. Indirect inferences derived from  
75 population genetic and genomic datasets constitute the most effective way forward for these taxa,  
76 and those approaches have continued to expand in both influence and sophistication in recent  
77 decades. Establishing the number of salamanders utilizing a breeding site or assessing the  
78 fragmentation effects of a road on burying beetles may require decades of intensive field work,  
79 but estimating the effective population size of that pond or genetic differentiation across that  
80 road can potentially be accomplished with a single field trip and a few months of lab work. For  
81 protected or endangered species, even rough estimates of key population parameters allow  
82 resource managers to parameterize population viability analyses (PVAs) and make scientifically  
83 sound, rapid assessments that are key for effective management.

84 A critical consideration when using molecular ecological methods to detect trends and  
85 parameterize models at very fine spatial scales has always been their limits of resolution. Theory  
86 and decades of empirical study have established that populations in close proximity tend to be  
87 very closely related (Wright, 1943), genetic change accumulates over time, and the ability to  
88 detect differentiation between genetically very closely related populations is limited by the  
89 number of samples and genetic loci assayed (Felsenstein, 2006; Patterson, Price, & Reich, 2006).  
90 Until recently, most population genetic studies of high conservation value species, and virtually  
91 all studies of amphibians have been limited to mitochondrial DNA or a small number of nuclear  
92 loci (typically microsatellites), although this is slowly changing as genomic technologies have  
93 evolved and been applied to amphibians (Keinath, Voss, Tsonis, & Smith, 2016; McCartney-  
94 Melstad, Gidiş, & Shaffer, 2017; McCartney-Melstad, Mount, & Shaffer, 2016; C. E. Newman &  
95 Austin, 2016; Portik, Smith, & Bi, 2016). However, most systems that might benefit from  
96 genomic scale data have yet to receive the attention of conservation genomicists.

97 Here, we present a comparative case study of the Eastern tiger salamander (*Ambystoma*  
98 *tigrinum*) to address two key questions that have broad implications across taxa. First, over the  
99 small spatial scales that characterize many conservation problems, does the added resolution of  
100 genomic-scale data make a substantive difference in the inferences and parameter estimates  
101 necessary for effective management? Second, when a well-designed microsatellite study is  
102 repeated with independent genome-level data from the same landscape, do the resulting  
103 conservation outcomes change?

104 The Eastern tiger salamander is a New York-listed endangered species (6 CRR-NY 182.5) that  
105 was historically found in few scattered localities across eastern New York including Albany and  
106 Rockland Counties, and across Long Island in sandy, vernal pool habitats. The species has

107 experienced dramatic declines in the region, and it is currently restricted to Suffolk County  
108 (Bishop, 1941; Stewart & Rossi, 1981; Breisch, pers. comm.), with approximately 90 remaining  
109 breeding ponds in central Long Island (New York State Department of Environmental  
110 Conservation, 2015). The species suffers a range of threats including disease, pollution,  
111 predation by invasive species, climate change-induced sea level rise, habitat loss, road mortality,  
112 illegal collecting and population fragmentation (Titus, Bell, Becker, & Zamudio, 2014).  
113 Telemetry studies documented individuals traveling at least 500 meters from breeding ponds and  
114 confirmed that they tend to avoid paved roads, dirt roads, and grassy areas (Madison & Farrand,  
115 1998).

116 Prior genetic work using twelve microsatellite loci recovered two population clusters of *A.*  
117 *tigrinum* across 17 ponds spanning 50 km on Long Island, both of which exhibited low diversity  
118 and high relatedness among ponds (Titus et al., 2014). The authors attributed the low diversity  
119 and high relatedness to a combination of post-glacial colonization from North Carolina (Church,  
120 Kraus, Mitchell, Church, & Taylor, 2003) and relatively frequent migration of salamanders  
121 between breeding ponds. Their primary conclusion was that endangered Long Island tiger  
122 salamanders were genetically uniform but differentiated from the nearest populations in New  
123 Jersey approximately 250 km distant. Most of the 17 Long Island ponds analyzed by Titus *et al.*  
124 (2014) were fewer than six kilometers apart, providing a challengingly small landscape over  
125 which to make inferences. The microsatellite loci showed relatively low diversity (1-13 alleles  
126 per locus across ponds and an average of 1-3 alleles per locus within ponds), and therefore were  
127 not as variable as is typical for these markers (Reyes-Valdés, 2013).

128 The Titus *et al.* (2014) research is an example of much of the best work on amphibian  
129 conservation genetics: they sampled a representative set of breeding ponds each for a large

130 population sample, used a reasonable number of variable genetic markers, and drew conclusions  
131 based on those data about population connectivity, fragmentation, and effective breeding size.  
132 However, their study also confronted empirical roadblocks. The microsatellites exhibited low  
133 levels of variation, resulting in reduced statistical power and the somewhat surprising result that  
134 gene flow among these low-vagility, pond-breeding animals was consistently high. Whether that  
135 inference represents the actual biology of the species, or is an artifact of the genetic tools  
136 available to their study, is an open question that speaks to the broader interpretation of similar  
137 studies (e.g. Jehle, Burke, & Arntzen, 2005; Lampert, Rand, Mueller, & Ryan, 2003; R. A.  
138 Newman & Squire, 2001; Zamudio & Wieczorek, 2007).

139 To explore this question, we applied a genomic target capture approach with 5,237 random  
140 nuclear exons to tiger salamanders sampled from the same set of ponds in central Long Island.  
141 We sought to answer four questions: 1) To what degree are ponds genetically connected to or  
142 differentiated from one another?, 2) What are the effective population sizes of ponds in the  
143 system, are they related to pond area, and how do these values compare to other amphibians?, 3)  
144 What are the effects of roads and traffic patterns on connectivity between ponds in the system?,  
145 and 4) Does the increased resolution of the genomic dataset provide additional insights for  
146 conservation above beyond those derived from microsatellites? Our results indicate that the gain  
147 in using genomic data is substantial, arguing that it may well be worth the effort and expense for  
148 other endangered species.

## 149 **Methods**

### 150 *Sampling and Data Generation*

151 Larval tissue samples were collected over three consecutive breeding seasons in the late  
152 spring of 2013, 2014, and 2015 using seines and dipnets. We timed our sampling to occur when  
153 larvae were large enough to sample non-destructively with small tail clips (Polich, Searcy, &

154 Shaffer, 2013). Tail tips were placed in 95% ethanol within 30 seconds of clipping, larvae were  
155 immediately released at the site of capture, and tail tips were stored at -80C until use. A hand-  
156 held GPS unit was used to locate ponds in the field, and final spatial coordinates and areas of  
157 ponds were taken from tracings of Google Earth images from February 2007. We sampled larvae  
158 from multiple locations within each pond to randomly sample the genetic variation present.

159 DNA was extracted using a salt extraction protocol (Sambrook & Russell, 2001), diluted to  
160 100 ng/ $\mu$ L, and sheared for 28 cycles (30s on, 90s off) using the “high” setting on a Bioruptor  
161 NGS (Diagenode). After shearing, samples were dual-end size selected to approximately 300-  
162 500bp using 0.8X-1.0X SPRI beads (Rohland & Reich, 2012). Libraries were prepared with  
163 between 419 and 2000 ng of starting input DNA using Kapa LTP library prep kit half reactions  
164 (Kapa Biosystems, Wilmington MA), dual-indexed using the iTru system (Glenn et al., 2016),  
165 combined into pools of 8 (500ng/library, 4,000ng total input DNA) and enriched using a  
166 MYcroarray (Ann Arbor, MI) biotinylated RNA probe set designed from 5,237 exons from  
167 unique genes from the California tiger salamander genome (McCartney-Melstad et al., 2016).  
168 Given the close phylogenetic relationships of all members of the tiger salamander complex  
169 (O’Neill et al., 2013; Shaffer & McKnight, 1996), we predicted that most of the probes would  
170 also capture the eastern tiger salamander homologs. A total of 30,000 ng of *cot-1* prepared from  
171 *Ambystoma californiense* was used for each capture reaction to block repetitive DNA from  
172 hybridizing with probes or captured fragments. Probes were hybridized for 30 hours at 60C,  
173 bound to streptavidin-coated beads, and washed four times with wash buffer 2.2 (MYcroarray).  
174 Enriched libraries were then amplified on-bead with 14 cycles of PCR, cleaned using 1.0X SPRI  
175 beads, and sequenced on three 150bp PE lanes on an Illumina HiSeq 4000.

176 *Reference Assembly*

177 We built a reference assembly for read mapping and SNP calling using the Assembly by  
178 Reduced Complexity (ARC) pipeline (Hunter et al., 2015). Reads from the 10 samples that  
179 received the greatest number of reads were pooled and mapped to the 5,237 *A. californiense*  
180 targets using bowtie2 v.2.2.6 (Langmead & Salzberg, 2012). Pools of reads mapping to each of  
181 these targets were independently assembled using SPAdes v.3.11.0 (Bankevich et al., 2012), and  
182 the contigs assembled for each target then replaced their respective targets and another round of  
183 mapping was performed to these contigs. This process was repeated for 10 iterations to extend  
184 assembled targets several hundred bp in both directions from their central probe-tiled regions.  
185 Reciprocal best blast hits (RBBHs) were then found to represent each target locus using blast+  
186 2.2.31 (Camacho et al., 2009). The set of RBBHs was then blasted against itself to find similar  
187 regions among targets, which may be indicative of chimeric assemblies. The longest contiguous  
188 region within each RBBH that did not exhibit similarity to other RBBHs was chosen as the target  
189 in the final assembly.

190 *SNP Calling and Genotyping*

191 Reads for all samples were trimmed to 150bp and adapters were trimmed using skewer 0.2.2  
192 (Jiang, Lei, Ding, & Zhu, 2014). These trimmed reads were then mapped to the reference  
193 assembly using BWA-mem 0.7.15 (Li, 2013). Read group information was added to the aligned  
194 reads and PCR duplicates were marked using picard tools v2.13.2

195 (<https://broadinstitute.github.io/picard/>).

196 SNP calling and genotyping was performed according to GATK best practices (DePristo et al.,  
197 2011; Van der Auwera et al., 2013). First, a set of high-quality reference SNPs was generated to  
198 assess and recalibrate base quality scores within each sample. To do this, HaplotypeCaller from  
199 GATK nightly-2017-10-17 (McKenna et al., 2010) was run separately on each sample in GVCF



200 mode followed by joint genotyping with GenotypeGVCFs. Then, any SNP that met any of the  
201 following criteria were filtered from the reference set:  $QD < 2.0$ ,  $MQ < 40.0$ ,  $FS > 60.0$ ,  
202  $MQRankSum < -12.5$ ,  $ReadPosRankSum < -8.0$ ,  $QUAL < 100$ . Similarly, any indel that failed  
203 any of the following criteria were also removed from the reference set:  $QD < 2.0$ ,  $SOR > 10.0$ ,  
204  $FS > 60.0$ ,  $ReadPosRankSum < -8.0$ ,  $QUAL < 100$ . Base quality score recalibration (BQSR) was  
205 then performed at the lane level (three different platform units among all of the read groups)  
206 using GATK.

207 HaplotypeCaller in GATK was then used with on-the-fly BQSR to generate sample-level  
208 GVCF files that were jointly genotyped using GATK's GenotypeGVCFs function. The same  
209 hard filters were then applied to the resulting VCF files, except that all SNPs with QUAL values  
210 above 30 (instead of 100) were retained. Genotype calls with phred-scaled quality scores under  
211 20 were set to "missing" data, and SNPs with greater than 50% missing data were removed.  
212 Samples with missing data rates greater than 30% were also removed.

213 Given the extremely large genomes of ambystomatid salamanders (roughly 30GB) (Keinath et  
214 al., 2015; Licht & Lowcock, 1991), we were concerned about the possibility of including  
215 duplicated paralogous loci in our analyses. We attempted to correct for this by filtering out loci  
216 that contained excessive heterozygosity, as differences between true paralogs interpreted as  
217 homologs typically appear as highly heterozygous sites. We used VCFtools v.0.1.13 to calculate  
218 p-values for heterozygote excess for every SNP (Danecek et al., 2011; Wigginton, Cutler, &  
219 Abecasis, 2005). Target regions that contained at least one SNP with an excess heterozygote p-  
220 value below 0.001 were removed from the analysis. A set of SNPs was then generated by  
221 randomly choosing a single SNP from each target region that did not contain any excessively  
222 heterozygous SNPs, and we refer to this as the "linkage-pruned" dataset.

223 *Population Genetic Analysis*

224 The presence of isolation by distance (IBD)—the relationship between geographic and genetic  
225 distance—was tested at both the individual and pond (population) levels. Individual genetic  
226 dissimilarity was calculated as one minus the percentage of all biallelic SNPs that were identical-  
227 by-state using the `snpGdsIBS` function in `SNPRelate` v1.6.4 (Zheng et al., 2012). The correlation  
228 and the significance of the relationship between these genetic distances and geographic distance  
229 was calculated using a Mantel test with 999,999 permutations in the R package `vegan` 2.4-0  
230 (Mantel, 1967; Oksanen et al., 2016).  $F_{st}$  values were calculated using pairwise differences  
231 between sequences in `Arlequin` v3.5.2.2 (Excoffier & Lischer, 2010) with 100,172 permutations  
232 of the data to compute p-values. Adjustment for multiple testing was performed using the  
233 Benjamini-Yekutieli method implemented in base R (Benjamini & Yekutieli, 2001). A Mantel  
234 test was run with `vegan` 2.4-0 to determine the relationship between  $F_{st}/(1-F_{st})$  and distance  
235 between ponds.

236 To characterize the level of genetic diversity present in tiger salamanders on Long Island, we  
237 calculated nucleotide diversity ( $\pi$ ) across all sequenced individuals and for each pond after  
238 pooling samples across years. First, `GenotypeGVCFs` from GATK was run with the  
239 `includeNonVariantSites` flag, removing indels and discarding targets that exhibited clear  
240 heterozygote excess compared to Hardy Weinberg equilibrium expectations. Sites where fewer  
241 than 50% of individuals were genotyped at a threshold quality of 20 were discarded, and per-site  
242  $\pi$  values (generated using `vcftools` v1.15) were summed and divided by the total number of  
243 qualifying genomic sites.

244 The linkage-pruned dataset was visualized using principal components analysis (PCA) in the  
245 R package `SNPRelate` v1.6.4 (Zheng et al., 2012). The first eight principal components were

246 plotted with letters corresponding to collection sites (ponds). The proportion of the variance  
247 explained by each principal component was also extracted using SNPRelate v1.6.4.

248 To estimate the number of distinct population clusters in the data, ADMIXTURE v1.3.0 was  
249 run using the linkage-pruned dataset for K=1 to K=30 with ten different random number seeds  
250 (Alexander, Novembre, & Lange, 2009). Each replicate was subjected to 100-fold cross  
251 validation (CV), and CV errors were used to choose a “reasonable” set of K values. If the  
252 standard deviation of CV values for any K value overlapped the standard deviation of the best-  
253 scoring K value, we included it as a reasonable value for K.

254 Effective population sizes ( $N_e$ ) for each pond were estimated using the linkage disequilibrium  
255 (LD) method in NeEstimator v2.01 with a minor allele frequency cutoff of 0.05 (Do et al., 2014;  
256 Hill, 1981). We calculated separate  $N_e$  estimates for all ponds pooled across years, and also for  
257 our pooled set of all 282 samples. LD-based estimates of effective population size from single  
258 cohorts (years sampled) represent the harmonic mean between the effective number of breeders  
259 ( $N_b$ ) and the true effective population size ( $N_e$ ) (R. K. Waples, Larson, & Waples, 2016).  
260 Alternatively, as the number of pooled cohorts approaches the generation length (the average age  
261 of parents for a cohort), LD-based estimators should approach the true  $N_e$  (R. S. Waples, Antao,  
262 & Luikart, 2014; R. S. Waples & Do, 2010).

263 Effective population size estimates using the LD method can be downwardly biased for  
264 multiple reasons. First, estimates may be biased when many loci are used due to physical linkage  
265 among loci, given that the method assumes the loci are unlinked (R. K. Waples et al., 2016). This  
266 effect is predictable, however, and can be corrected if the number of chromosomes or total  
267 linkage map length is known. An estimate of the linkage map length is available for the closely  
268 related axolotl, *Ambystoma mexicanum*, and we used this number (4200cm) to correct estimates

269 of effective population size for dense locus sampling by dividing them by 0.9170819 (or  $-0.910$   
270  $+ 0.219 \times \ln(4200)$ ) (Voss et al., 2011; R. K. Waples et al., 2016). LD-based estimates of  
271 effective population size can also be downwardly biased when analyzing mixed cohorts in  
272 iteroparous species such as *A. tigrinum*, although this bias decreases as the number of sampled  
273 cohorts approaches the generation length of the species (R. S. Waples et al., 2014; R. S. Waples  
274 & Do, 2010). Therefore, single-cohort estimates of  $N_e$  were further corrected by dividing dense-  
275 locus adjusted estimates by 0.8781801, the product of two equations from Table 3 of Waples et  
276 al. (2014) that use the ratio of adult lifespan (estimated at 7 years for the closely related *A.*  
277 *californiense*) to age at maturity (4 years, also in *A. californiense*) (Trenham, Shaffer, Koenig, &  
278 Stromberg, 2000) to compensate for the downward bias introduced by iteroparity:  $(1.103 - 0.245 * \log(7/4)) * (0.485 + 0.758 * \log(7/4))$ . We used linear regression to quantify the relationship  
279 between pond area and effective population size, using multi-year estimates of  $N_e$  when  
280 available.  
281

### 282 *Impact of Roads*

283 We were interested in assessing the degree that roads restrict movement on this landscape.  
284 First, traffic data were downloaded from the New York State Department of Transportation  
285 (<https://www.dot.ny.gov/tdv>). Straight lines were drawn between ponds, and the annual average  
286 daily traffic (AADT) values of road segments intersected by these lines were summed, yielding a  
287 pairwise distance matrix of traffic between ponds (upper diagonal, Table 2). These values were  
288 divided by 11,702, the AADT of New York State Route 25 in the region, to scale the  
289 environmental distance matrix into units of “New York State Route 25 equivalents crossed”. The  
290 contributions of geographic and environmental (road) distances to the observed genetic variation  
291 were calculated using the genetic covariance decay model implemented in the software  
292 BEDASSLE (Bradburd, Ralph, & Coop, 2013), which avoids the statistical problems inherent in

293 partial Mantel tests (Guillot & Rousset, 2013). This method fits a model of exponential decay in  
294 genetic covariance as a function of geographic and environmental distance. The final result is an  
295 expression of the contributions of geographic and genetic distance to observed spatial genetic  
296 patterns in comparable units. The MCMC\_BB function in BEDASSLE was run for 5 million  
297 generations on the linkage-pruned dataset and sampled every 5,000 steps.

## 298 **Results**

299 *Sampling:* We genotyped 283 *Ambystoma tigrinum* larvae from 17 ponds spread over an  
300 approximately 35 km<sup>2</sup> area (Figure 1, Table 1). More than 1.9 billion 150-bp sequencing reads  
301 were generated from three Illumina HiSeq 4000 lanes across these samples (mean=6.8 million  
302 reads/sample, min=1.8 million reads, max=10.9 million reads).

303 *Reference assembly:* The ten samples that received the most sequencing reads were pooled to  
304 generate a *de novo* reference assembly, for a total of 67 million merged and paired-end  
305 sequencing reads (11.7 billion total bp). Assembly of target regions with the ARC assembler  
306 produced a set of 61,621 contigs (39.9 million bp) from which 5,072 reciprocal best blast hits  
307 were recovered (6.6 million bp). After blasting these contigs against themselves, trimming self-  
308 complementary regions to the ends of contigs, and re-determining reciprocal best blast hits, a 6.5  
309 million bp assembly with 5,068 target regions (96.8% of the originally targeted regions) was  
310 recovered for mapping reads and calling SNPs.

311 *SNP Calling and Genotyping:* An average of 29.05% of raw reads mapped to the reference  
312 assembly using BWA-mem across all 283 samples (sd=2.50%, min=20.19%, max=34.13%).  
313 Removing PCR duplicates (read pairs that map to the exact same position on the reference,  
314 indicating that they may be PCR amplicons from the same molecule) resulted in an average of  
315 16.95% unique reads mapped to the reference (sd=2.42%, min=8.57%, max=22.57%). After joint  
316 genotyping, a total of 79,233 raw SNPs were recovered across 4,414 target regions. Applying

317 hard filters to SNP loci, setting the minimum genotype call quality to 20, discarding variants  
318 genotyped in fewer than half of all samples, and removing the one sample with a missing data  
319 rate greater than 30% yielded a total of 22,513 retained SNPs across 3,640 target regions. Tests  
320 for Hardy Weinberg equilibrium revealed 540 targets contained at least one SNP with clear  
321 ( $p < 0.001$ ) heterozygote excess, which is consistent with (though not definite evidence of) the  
322 presence of an unknown paralogous copy of this gene in the genome. We removed these target  
323 regions from the analysis, leaving a total of 12,955 biallelic SNPs across 3,095 target regions.  
324 The final matrix contained 282 individuals with a mean missing data rate of 8.09%  
325 (max=28.65%, min=2.13%, sd=4.53%), and the linkage-pruned dataset contained one random  
326 biallelic SNP from each final target for a total of 3,095 variants.

327 *Genetic variation and isolation by distance (IBD)*: Nucleotide diversity within ponds ranged  
328 from  $1.79 \times 10^{-3}$  to  $2.50 \times 10^{-3}$  (Table 1) and was  $2.11 \times 10^{-3}$  for the combined 282 samples. IBD was  
329 apparent at both the individual and pond levels. Mantel tests of the significance of correlations  
330 between individual and pond genetic and geographic distances yielded p-values of  $1 \times 10^{-6}$  and  
331  $1.2 \times 10^{-5}$  and Mantel  $R^2$  statistics of 0.1743 and 0.4092, respectively. This strongly indicates that  
332 there is a significant relationship between geographic and genetic distance, even at the extremely  
333 fine scale studied here.

334 Pairwise  $F_{st}$  values between ponds ranged from 0.005 to 0.210 (136 comparisons,  
335 median=0.064, sd=0.042, Table 2). Using Benjamini-Yekutieli (BY) corrected p-values, 118 out  
336 of 136 of these pairwise comparisons were significant. Of the 18 non-significant pairwise  
337 comparisons, 16 were from pond L, which contained only a single sample and therefore had  
338 extremely low power. Many of the highest  $F_{st}$  values were from pairwise comparisons  
339 containing ponds A or Q. These ponds are both geographical outliers separated by greater

340 geographic distance (pond Q) and by more major roads (both A and Q) from other sites than are  
341 all other ponds (Figure 1).

342 *Principal Component Analysis:* The first eight principal components (PCs) together account  
343 for 13.5% of the total genetic variation (Figure 2). PC1 groups samples from pond A to the  
344 exclusion of the other samples, while PC 2 does the same for samples from ponds E and G. PC 3  
345 separates ponds B, C, and D from the other ponds (especially ponds N and part of J), and PC4  
346 appears to be an axis of variation between ponds J and Q/N. Finally, PCs 5, 6, 7, and 8  
347 correspond to axes that differentiate ponds N, P, and Q, along with some samples from ponds A  
348 and J. Overall, clustering of single ponds and small groups of closely adjacent ponds is quite  
349 apparent, indicating the presence of easily detectable population structure with these genomic  
350 data.

351 *Population Clustering:* The value of K in ADMIXTURE with the lowest mean CV error was  
352 K=12. Three other K values (9, 10, and 11) had CV error standard deviations that overlapped  
353 with K=12 (Figure S1). Admixture proportions for K=9 through K=12 are shown in Figure 3,  
354 and are split by both pond and sampling year (Glasbey, van der Heijden, Toh, & Gray, 2007).  
355 Results from ADMIXTURE analyses corroborated the qualitative patterns observed in the PCA.  
356 Pond A generally formed one to three clusters to the exclusion of all other ponds (as recapitulated  
357 in PCs 1, 6, and 8). Ponds B, C, and D formed a single cluster to the exclusion of other ponds (as  
358 also seen in PC 3). Similarly, ponds E and G form a unique cluster at K=9 (corresponding to PC  
359 2), but are separated into their own private clusters at K=10 through K=12. Pond F,  
360 geographically separated from its closest neighbors (ponds E and G) by NY State Route 25,  
361 appears strongly admixed at K=9 through K=12. Ponds H, I, J, K, L, and M appear to be strongly  
362 associated across all K values (although ponds I, L, and M appear highly admixed), except for

363 one year of sampling in pond J (2014), which produced a group of animals that formed their own  
364 cluster. Pond N is distinct across all K values (which can also be seen on PCs 3-8). Pond O  
365 appears highly admixed across all K values, but tends to share a considerable admixture  
366 component with the cluster formed by pond P (and pond Q for K=9 and K=10). At K=11 and  
367 K=12, pond Q forms its own cluster to the exclusion of all other ponds, a pattern that is also  
368 apparent in PCs 5 and 6.

369 *Effective Population Size:* Estimates of effective population size ranged from 9.81 for pond N  
370 to 138.20 for pond K (Table 1). Pond surface areas were strongly correlated with effective  
371 population size estimates ( $p=0.00122$ ,  $R^2=0.5623$ , Figure 4). Dropping pond H, the clear outlier  
372 in Figure 4, increases the significance of this relationship ( $R^2$  of 0.849,  $p<0.000005$ ), while  
373 dropping both ponds H and K (the extreme outlier in terms of pond size, and therefore a highly  
374 influential value) still returns a significant positive relationship ( $R^2$  of 0.671,  $p<0.0007$ ). The  
375 number of samples included in the calculation of  $N_e$  was not correlated with the resulting  $N_e$   
376 estimate (linear regression  $p=0.2448$ ,  $\text{adj } R^2=0.03341$ ), suggesting that sample size was not a  
377 driver of  $N_e$  estimates.

378 *Roads as Barriers to Dispersal:* Roads play a strong role in structuring among-pond genetic  
379 divergence in Long Island tiger salamanders. We calculated the relative contributions of  
380 geographic distance and roads (scaled by traffic) between ponds with 10 independent runs of the  
381 covariance decay model in BEDASSLE. Nine out of 10 runs found that the presence of one road  
382 with the same traffic as New York State Highway 25 (orange line in Figure 1) has an equivalent  
383 effect on population divergence as 6.2km to 8.8km of Euclidean distance, while the remaining  
384 run measured this effect at 4.4km (posterior medians in Figure 5). Posterior predictive sampling  
385 (Figure S2) indicated that this model did a good job of modelling the effects of geographic



386 distance and isolation by roads on pairwise genetic relationships among ponds. These results  
387 indicate that dispersal is severely limited by roads, and that human activity has contributed to  
388 isolation of ponds in this region.

### 389 **Discussion**

390 Population genetic structure is often difficult to detect and quantify accurately among subtly  
391 differentiated populations, including those in close geographic proximity (Wright, 1943). As  
392 conservation geneticists, however, we are often interested in understanding limitations to gene  
393 flow imposed by recent anthropogenic activities. A satisfactory explanation of the factors that  
394 impinge on gene flow requires a clear picture of how populations are structured on the landscape.  
395 Our RADseq approach provided the resolution necessary to evaluate the influence of human  
396 disturbance on the movement of endangered salamanders, and in particular the role that roads  
397 play in limiting among-pond dispersal. Posterior distributions of geographical and environmental  
398 coefficients calculated in BEDASSLE showed that the presence of two moderately sized roads  
399 isolated ponds by the same amount as roughly 14 km, or nearly the entire length of the study  
400 system. In contrast to microsatellites, genomic-scale data provided the resolution required to  
401 detect the effects of geographic distance and roads on dispersal, despite the relatively recent  
402 construction of roads in the area. Assuming that this effect on dispersal accumulates with time, it  
403 also suggests that roads are probably more important than geographic distance in shaping  
404 population structure, given the magnitude of their effect over only a few generations. In support  
405 of this, a previous study of the yellow-spotted salamander (*Ambystoma maculatum*) in central  
406 New York state found between 50% and 82% adult mortality due to car strikes at a road crossing  
407 (Wyman, 1991), levels that are more than sufficient to cause the measurable impacts on gene  
408 flow that we document (Gibbs & Shriver, 2005). This knowledge will be critical for future  
409 conservation planning.

410 Prior studies have illustrated that amphibian genetic differentiation is sometimes (e.g. Savage  
411 et al., 2010; I. J. Wang, 2009, 2012, I. J. Wang et al., 2011, 2009), but not always (e.g. Jehle,  
412 Burke, & Arntzen, 2005; Lampert, Rand, Mueller, & Ryan, 2003; R. A. Newman & Squire,  
413 2001; Zamudio & Wiczorek, 2007) detectable at very fine spatial scales. The key question, for  
414 molecular ecology and conservation biology alike, is whether such results represent biological  
415 differences among species and habitats or the resolving power of the molecular markers utilized,  
416 which itself is shaped by deeper-time demographic processes such as bottlenecks and range  
417 expansions (Slatkin, 1993; Watterson, 1984). While microsatellite loci have been extremely  
418 valuable for conservation genetics, a panel of 20 microsatellites has been shown to be  
419 approximately as effective for estimating genetic relationships as just 50 SNP loci (Santure et al.,  
420 2010). Increasing the number of microsatellite loci above 20 is both difficult and expensive, but  
421 it is now straightforward to scale the number of SNPs assayed into the (tens of) thousands,  
422 increasing our ability to distinguish barriers to gene flow that are subtle or have only been  
423 operating for relatively few generations (Anderson et al., 2010; Patterson et al., 2006). As  
424 genomic-scale datasets become comparable with microsatellites in terms of cost and feasibility,  
425 the added resolution from thousands of loci will give a particular boost to population genetic  
426 studies in systems with low genetic diversity, and will open entire new classes of analyses to  
427 both low- and high-diversity systems.

428 The current study is among the first to use thousands of nuclear loci across hundreds of  
429 individuals in a large-genome (~ 30 gigabase) amphibian and represents an opportunity to  
430 directly compare results between two genetic approaches in the same system. While little genetic  
431 clustering was apparent in the microsatellite loci analyzed by Titus et al. (2014), our dataset of  
432 thousands of nuclear SNPs revealed clear population genetic structuring among the same

433 breeding ponds of *Ambystoma tigrinum* on Long Island. The major genetic patterns in our data  
434 are readily apparent in both ADMIXTURE and PCA results, and our genetic analyses of pond  
435 structuring returned generally consistent results across years (Figure 3), suggesting that the  
436 observed patterns of genetic structure do not represent idiosyncratic interannual variation.

437 Species with low genetic diversity require collecting data from a greater number of genetic  
438 loci to detect population structure (Patterson et al., 2006), and one cause of low genetic diversity  
439 is a recent range expansion. Church *et al.* (2003) analyzed *Ambystoma tigrinum* mitochondrial  
440 DNA and determined that New York was likely recolonized by salamanders from Pleistocene  
441 refugia in North Carolina. This was corroborated by Titus et al. (2014), who found low genetic  
442 diversity in microsatellite loci in New Jersey and Long Island tiger salamanders. To better  
443 understand whether this low genetic diversity was responsible for the low resolving power of  
444 microsatellite (Titus et al. 2014) compared to target capture (current study) datasets, we  
445 calculated genetic diversity for each pond and across all 282 samples. Nucleotide diversity across  
446 the 282-sample dataset was  $2.11 \times 10^{-3}$ , indicating that Long Island tiger salamanders have lower  
447 diversity than 67 of the 76 species measured by Romiguier *et al.* (2014). Such low levels of  
448 genetic diversity may well be a function of Pleistocene glacial history and recolonization  
449 dynamics, and generally indicate that large genetic datasets are necessary to discern real, but  
450 subtle population structure as occurs in this system.

451 Breeding ponds that we examined generally exhibited small effective population sizes (<  
452 100), consistent with results found for many other amphibian species (McCartney-Melstad &  
453 Shaffer, 2015; Phillipsen, Funk, Hoffman, Monsen, & Blouin, 2011; Schmeller & Merilä, 2007).  
454 Our estimates (mean=43.4) are larger than, but of the same magnitude as microsatellite-based  
455 estimates recovered by Titus *et al.* (2014) using the sibship method (J. Wang, 2009), which had a

456 mean value of 20.9. We did, however, recover several ponds with effective population sizes  
457 higher than 44, which was the maximum value recovered by Titus *et al.* (2014). These included  
458 pond H ( $N_e=92.4$ ), pond K ( $N_e=138.2$ ), pond M ( $N_e=75.31$ ), and pond O ( $N_e=63.92$ ), and may  
459 indicate that the area around these ponds, which was not directly sampled by Titus *et al.* (2014),  
460 harbors greater effective population sizes than elsewhere on Long Island.

461 We also recovered a clear relationship between pond size and effective population size  
462 ( $p=0.00122$ ,  $R^2=0.5623$ , Figure 4), a critical result for two reasons. First, this area/population  
463 size relationship has been previously reported in two independent studies of another member of  
464 the tiger salamander complex, *A. californiense* (I. J. Wang *et al.*, 2011; I. J. Wang & Shaffer,  
465 2017); the consistency across studies indicates that the largest breeding ponds harbor the greatest  
466 potential for species persistence genetically and demographically. In the absence of genetic data,  
467 managers working across diverse habitats (CA, NY) may be able to use pond size as a reasonable  
468 proxy for population size, and therefore, conservation value. Second, these data emphasize the  
469 importance of connectivity and metapopulation dynamics in this system. The pond for which  
470 surface area did the poorest job predicting  $N_e$ , Pond H, had a much higher effective population  
471 size estimate than predicted (Figure 4). Pond H is geographically closest to Pond K, which has  
472 the largest effective population size estimate in the study. The landscape between Pond H and  
473 Pond K is forested with no major roads or other anthropogenic barriers to gene flow, the  $F_{st}$   
474 value between ponds H and K is the lowest of any pairwise comparison between ponds  
475 ( $F_{st}=0.005$ , Table 2), and these ponds were consistently recovered in the same ADMIXTURE  
476 cluster (Figure 3). Taken together, this provides strong evidence that migration is common  
477 between Ponds H and K, and that the effective population size of Pond H is augmented by its  
478 close relationship with the very large Pond K. Given the importance of large  $N_e$  for current and

479 future adaptation and resiliency (Frankham et al., 2017), this confirms the critical importance of  
480 maintaining connectivity and metapopulation dynamics for these endangered populations.

#### 481 **Conclusion**

482 From a biological perspective, our results demonstrate that endangered *Ambystoma tigrinum*  
483 on Long Island generally have small to modest effective population sizes that are correlated with  
484 the surface area of ponds, naturally limited migration among ponds, and severely constrained  
485 dispersal and disrupted metapopulation dynamics because of roads. The interrelationships  
486 between these factors are important for conservation management. Small effective population  
487 sizes imply that ponds are more likely to suffer random demographic extinction, and highly  
488 structured populations indicate that locally extirpated ponds (such as those that do not fill with  
489 water for many years in a row) may not be easily recolonized by individuals from nearby sites  
490 even a kilometer or two distant. Roads, especially those with high traffic, and other human  
491 activities add to these natural dynamics, emphasizing the critical importance of conserving  
492 blocks of contiguous habitat with pond complexes that can persist as semi-isolated  
493 metapopulations. Within this Long Island landscape, there are several pond clusters that  
494 periodically share migrants (ponds B, C, and D; ponds H, I, J, K, L, and M; and ponds O and P).  
495 Maintaining these dynamics is likely critical for the long-term persistence of these locally  
496 endangered tiger salamanders because they are potential source populations for nearby ponds as  
497 they go locally extinct and require rescue. However, the presence of roads disrupts this pattern,  
498 as seen by the tendency of nearby ponds separated by major roads to fall into different genetic  
499 clusters (such as Pond A vs. ponds B, C, and D and Pond F vs. ponds E and G).

500 From a methodological perspective, our work demonstrates that a genomic approach was  
501 critical to detect and quantify existing, fine-scale population structure in this post-glacially  
502 recolonized area. Titus *et al.* (2014) recovered little genetic structure among endangered

503 populations of Long Island tiger salamanders and inferred relatively high migration rates  
504 between ponds. Our genomic approach revealed the opposite pattern, with restrictions in  
505 movement between many groups of ponds despite low overall levels of genetic differentiation.  
506 The generality of such drastic differences in inferred biological processes is an unanswered  
507 empirical question that requires additional comparative studies across taxa, landscapes, and  
508 demographic histories.

509 Finally, from a conservation perspective, our genomic results suggest that ponds that are not  
510 separated by major roads almost certainly have increased resilience to local extirpation via  
511 demographic rescue from neighboring ponds, and that they also may benefit from genetic rescue  
512 as climate and other anthropogenic changes necessitate rapid evolutionary responses. Our  
513 strongest conclusion is that efforts should be made to prevent activities that restrict movement  
514 among clusters of ponds, particularly as decisions on conservation and property use are made in  
515 this critical open space. The landscape bounded by the Brookhaven National Laboratory to the  
516 west and Pond Q to the east represents a relatively intact, ~100 km<sup>2</sup> ecological oasis and the last  
517 stand for this endangered amphibian in the northeastern US. It should remain that way.

#### 518 **Acknowledgments**

519 Funding was provided by the Andrew Sabin Family Foundation. EMM and HBS also received  
520 support from NSF-DEB 1457832 and NSF-DEB 1257648. We thank Alvin Breisch, Andy Sabin,  
521 Pete Davis, and Jeremy Feinberg for assistance with fieldwork, Megan Sha and Rice Zhang for  
522 laboratory support, and Kirk Lohmueller and Beth Shapiro for helpful comments on an earlier  
523 version of this manuscript. This work used the Vincent J. Coates Genomics Sequencing  
524 Laboratory at UC Berkeley, supported by NIH S10 Instrumentation Grants S10RR029668 and  
525 S10RR027303. Computing resources were provided by XSEDE (Towns et al., 2014) and the  
526 Comet supercomputer at SDSC, supported by NSF ACI-1548562.

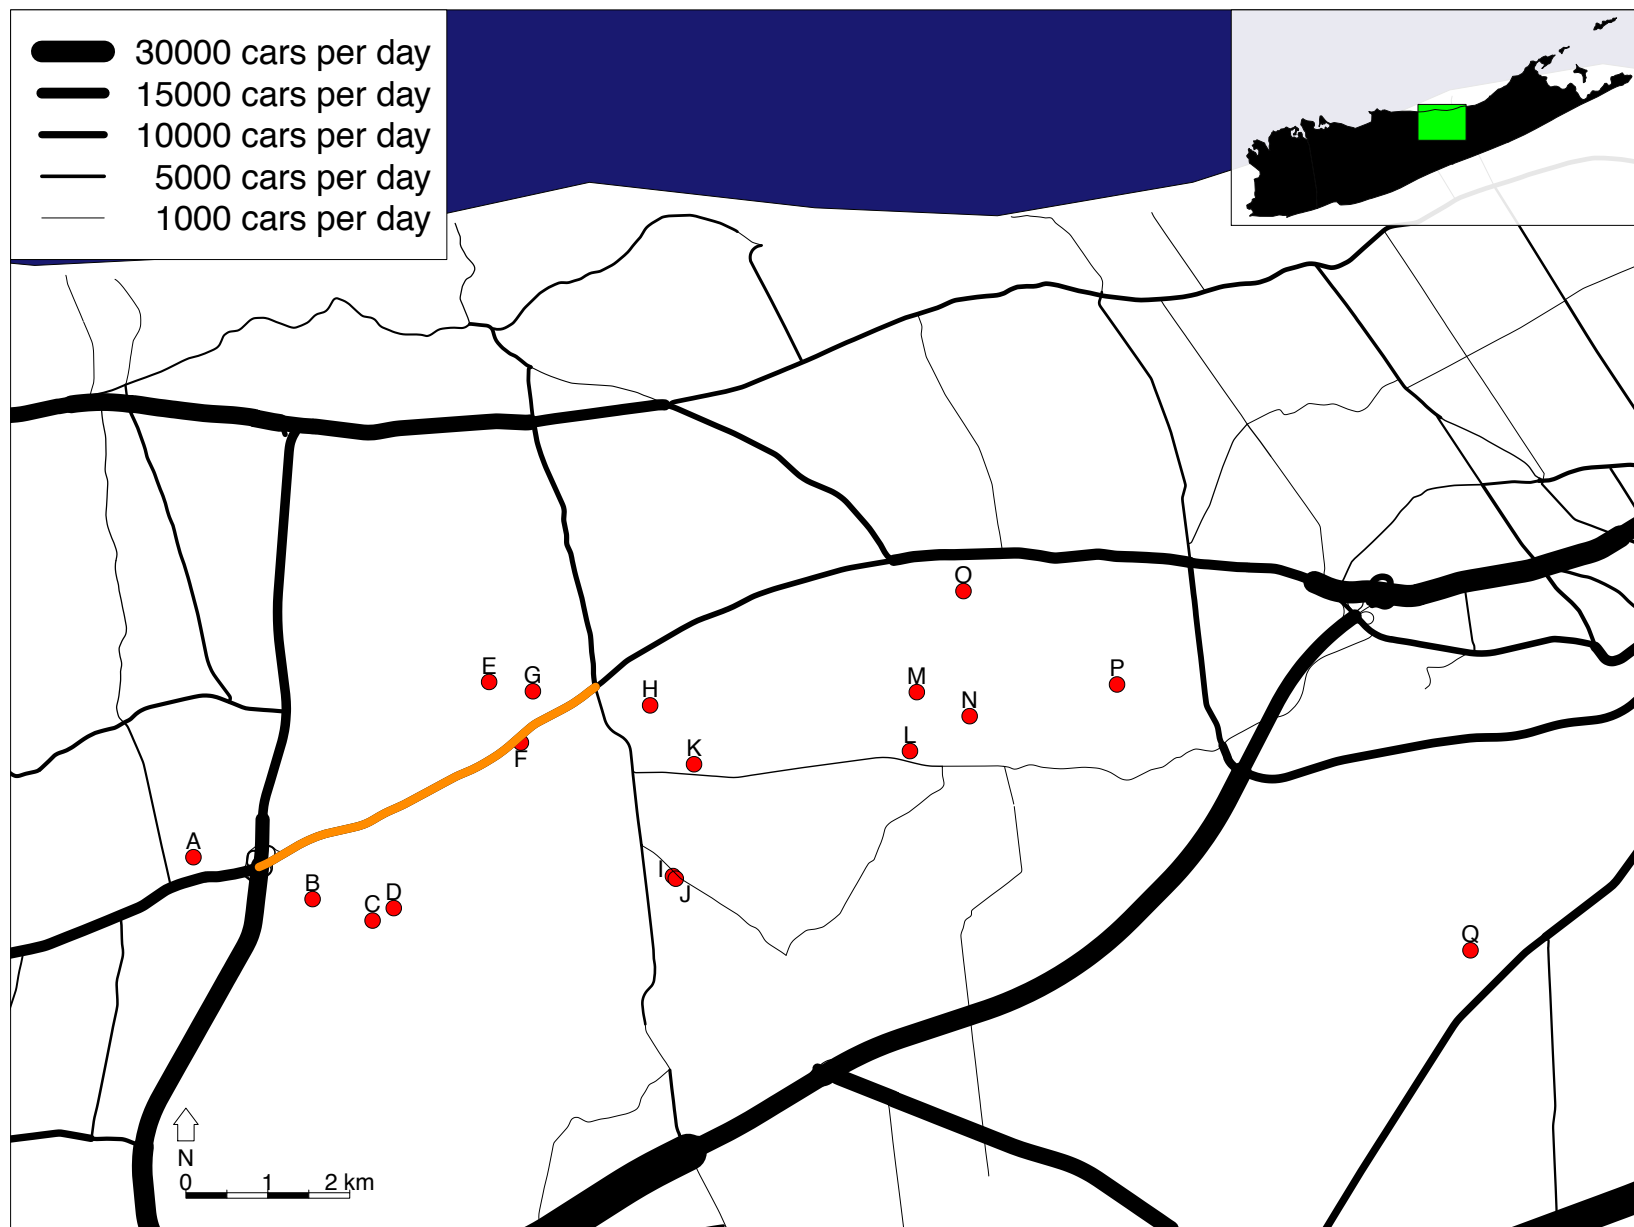

**Figure 1:** Map of sampling localities. Black lines indicate roads, and line thickness represents the average annual daily traffic (AADT) volumes of road segments. Sampling localities are represented by red dots. The road segment plotted in orange is the segment of New York State Route 25 used to standardize traffic measurements for BEDASSLE analyses (AADT=11,702).

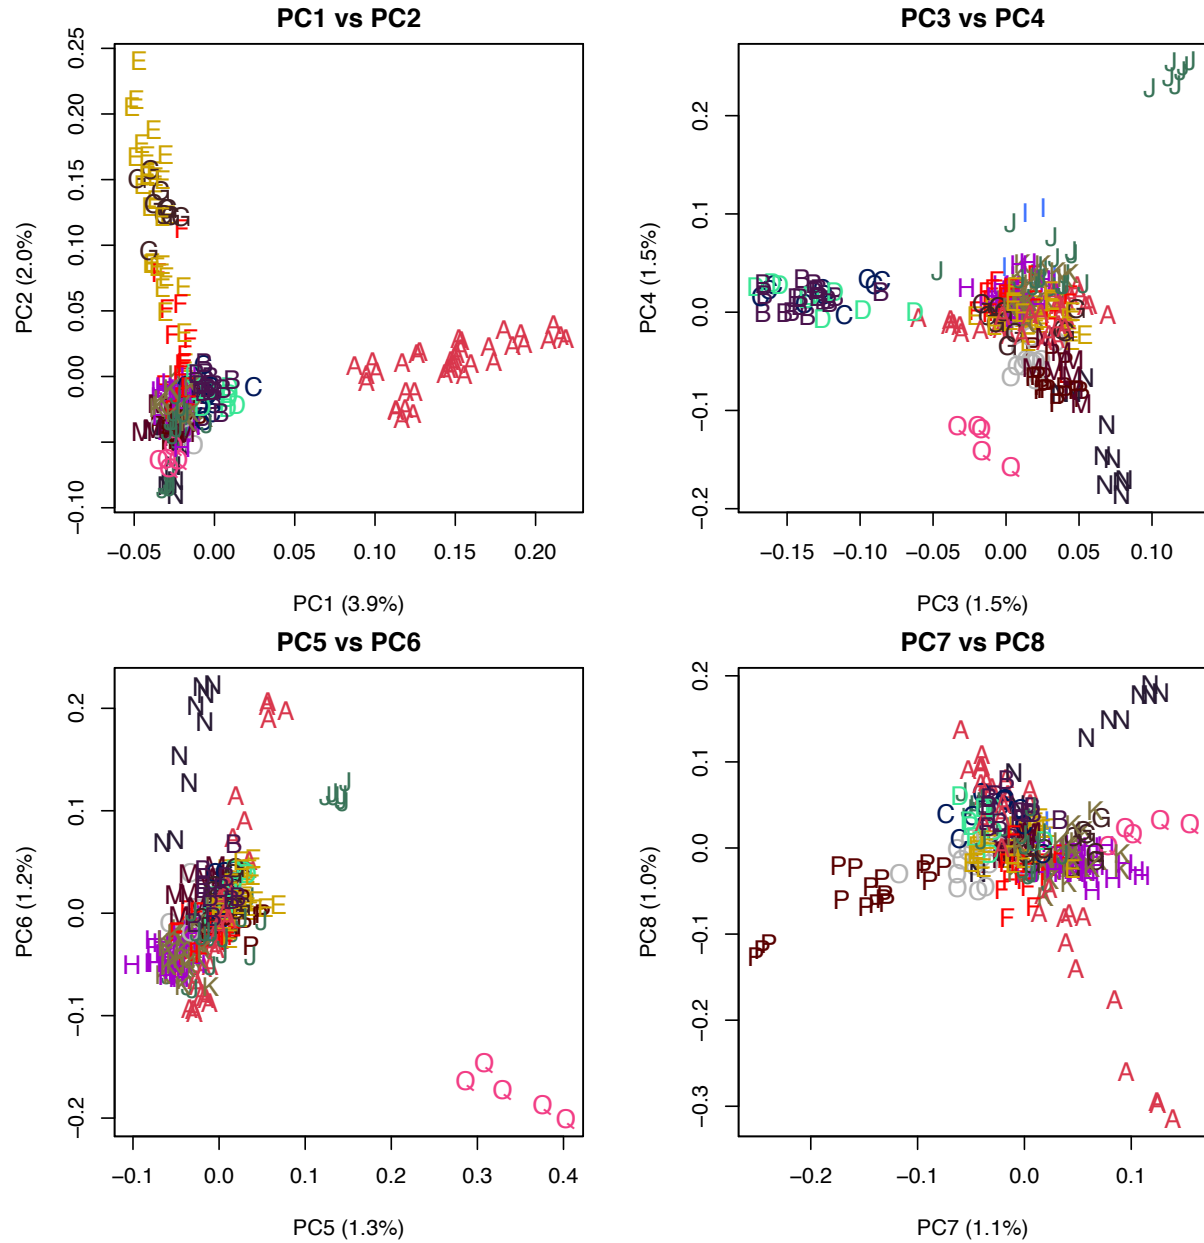

**Figure 2:** First eight principal components of the data. Letters on the graph correspond to samples from the same pond. Colors are used only to aid in distinguishing between letters.



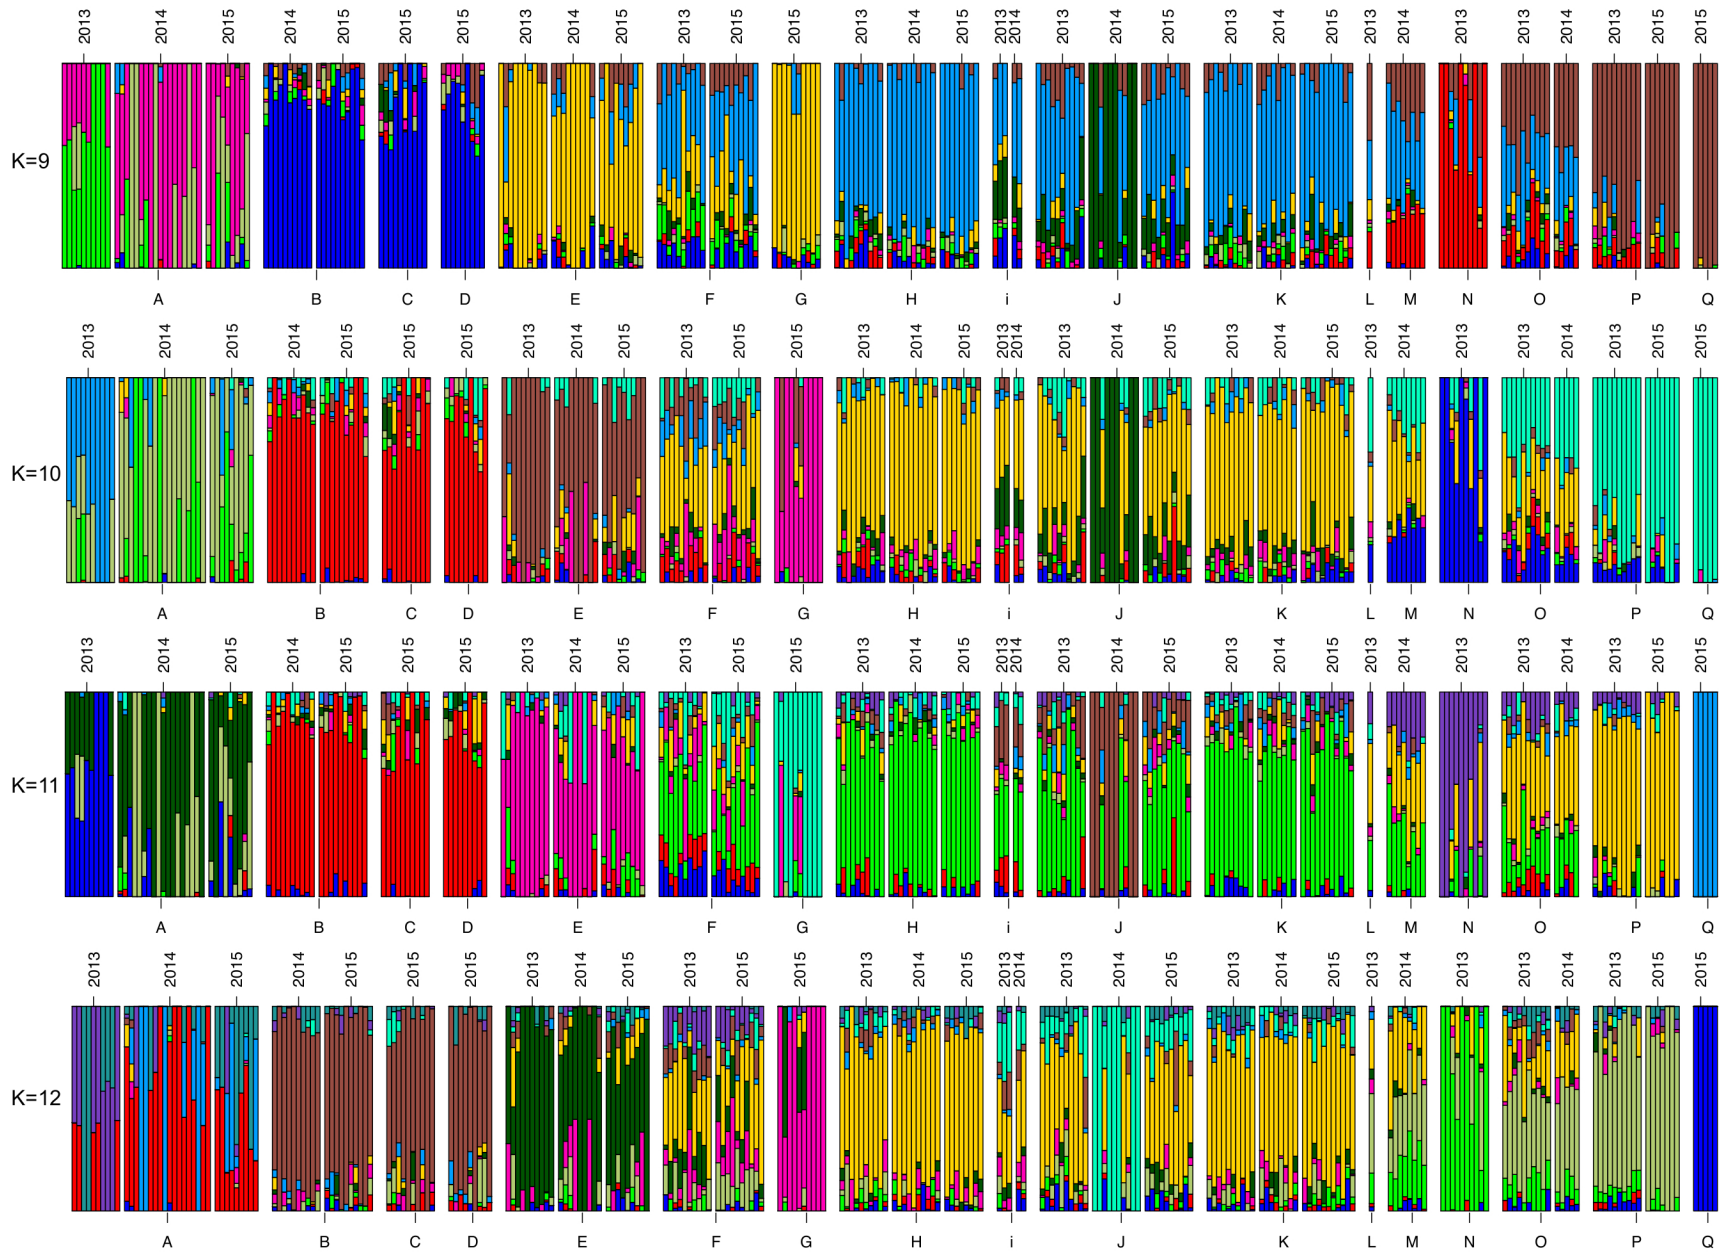

**Figure 3:** Admixture results from all 282 samples. Letters correspond to ponds from the sample map (Figure 1). Thin white spaces separate sampling years within ponds, and thicker white spaces separate ponds from one another.

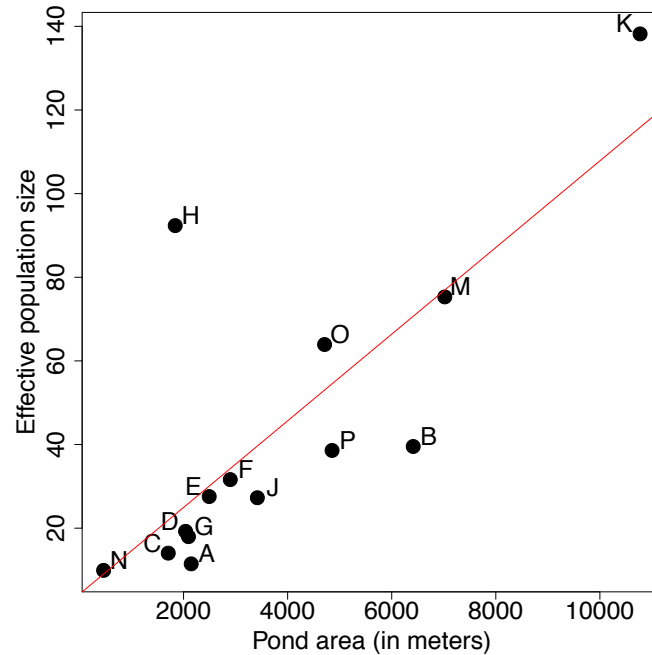

**Figure 4:** Relationship between pond area and effective population size estimate ( $p=0.00122$ , adjusted  $R^2=0.5623$ ).  $N_e$  estimates represent multiple-cohort calculations if multiple cohorts were sampled, otherwise single-year estimates are used. Ponds I, L, and Q were omitted because they did not contain enough samples to generate non-infinite  $N_e$  estimates across replicates.

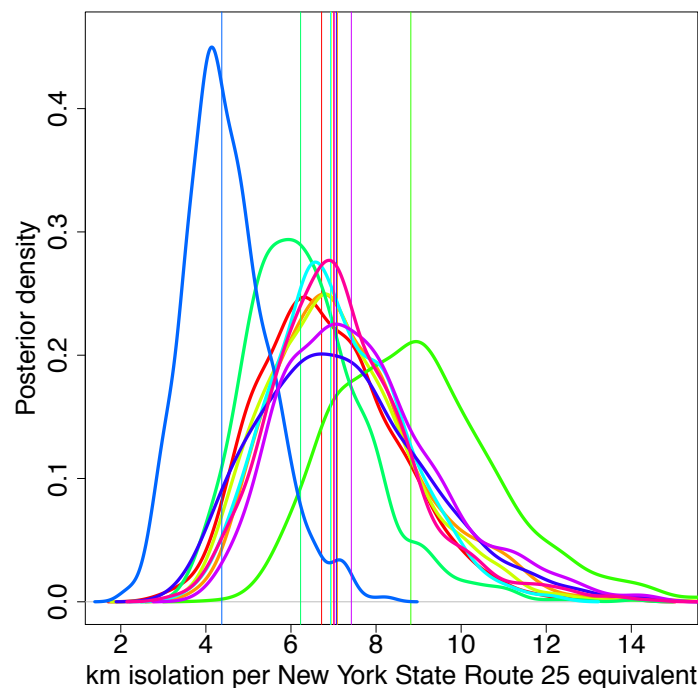

**Figure 5:** Posterior distributions of BEDASSLE  $aE/aD$  values with 100 generations of burnin. Each curve represents 1 of 10 independent BEDASSLE runs, and vertical lines indicate median values of the posterior distributions. The x-axis quantifies the relative impacts of geographic and environmental distance. For instance, a value of 7 indicates that a road with traffic equal to New York State Route 25 isolates ponds by the equivalent of 7km of geographical distance.

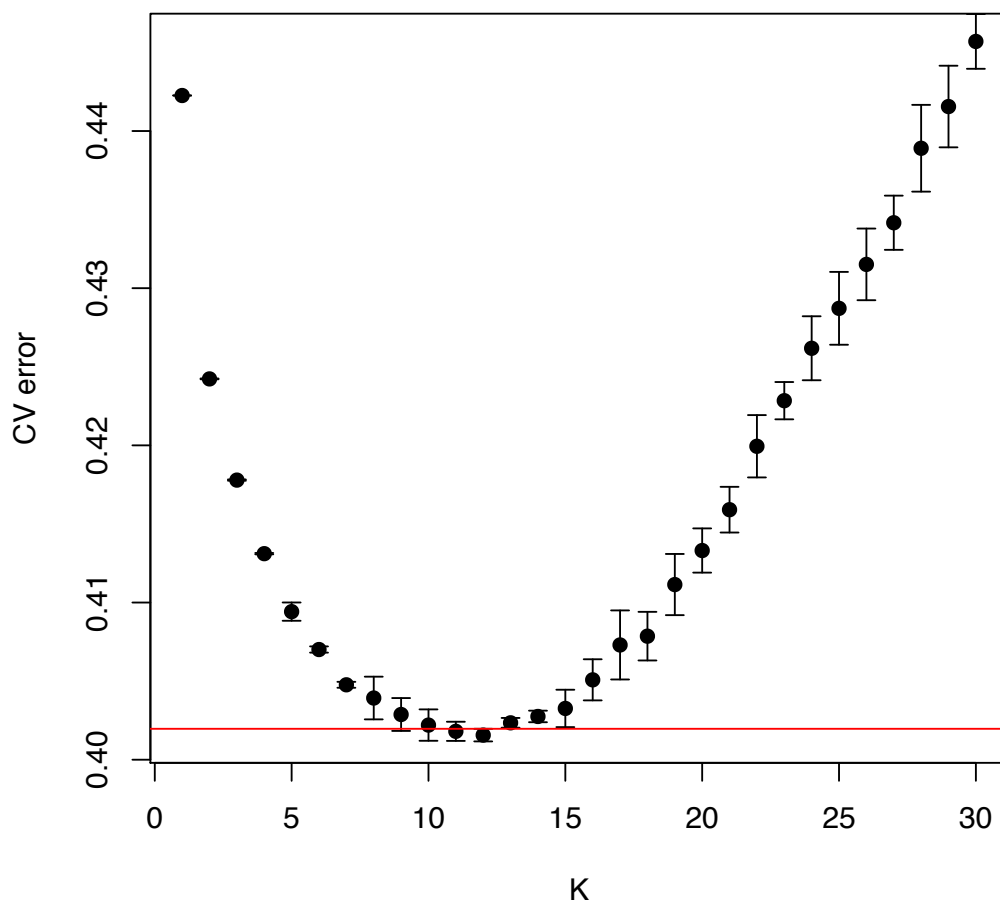

**Figure S1:** Cross-validation error means and standard deviations from 10 ADMIXTURE runs using different seeds. The red line is drawn at the mean+SD of the best-performing K value (K=12). The standard deviations for K=9 through K=12 overlap this line.

## Posterior Predictive Sampling

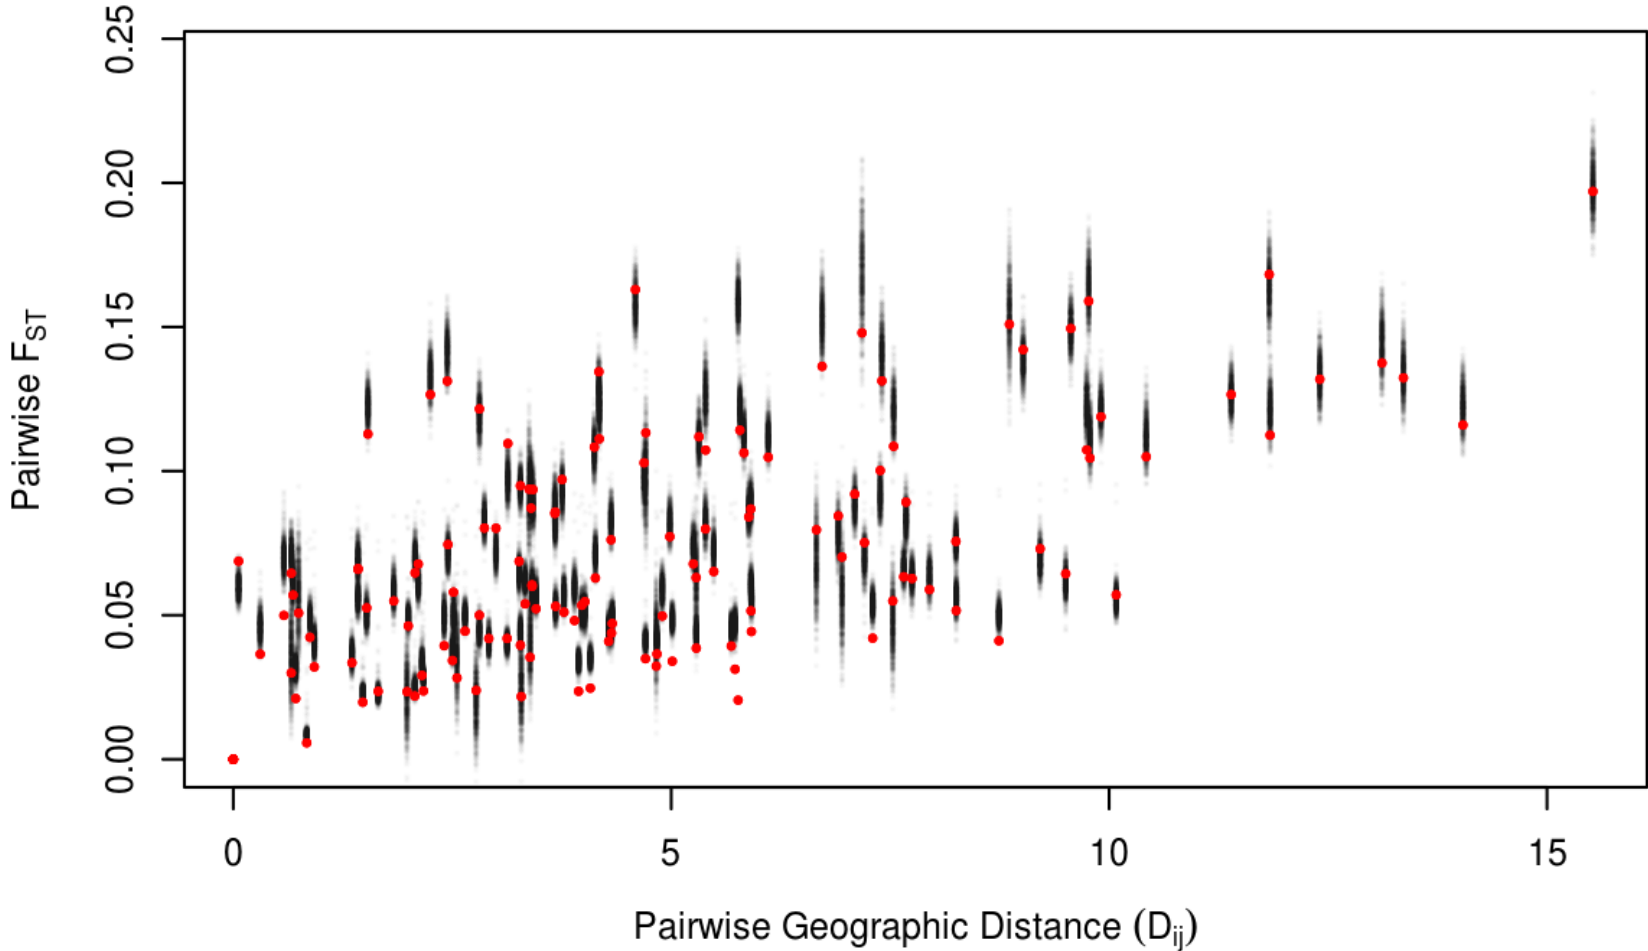

**Figure S2:** Visualization of model fit of highest-probability BEDASSLE run. Red dots indicate empirically observed  $F_{ST}$  values between ponds, while black dots indicate predicted  $F_{ST}$  values from 1000 posterior predictive samples.

## Tables

**Table 1:** Pond localities, areas,  $\pi$  estimates, sampling, and effective population size estimates. Pond areas were estimated from Google Earth satellite images taken in February 2007. Single-year estimates were corrected for iteroparity-induced downward bias as explained in Methods, and both single-year and pooled-year estimates were corrected for dense locus sampling on chromosomes. Infinite values indicate that sample sizes were likely too small to estimate  $N_e$ —3 of 10, 10 of 10, and 10 of 10 replicates yielded infinite values for ponds I, L, and Q, respectively. N=number of samples included in analyses.  $N_e$ =Effective population size estimates using LD method, with standard deviations from 10 replicates. The “All” category denotes all 282 samples pooled across ponds.

| Pond       | Latitude  | Longitude  | Pond Area (m <sup>2</sup> ) | Nucleotide diversity ( $\pi$ ) | N (2013/2014/2015) | $N_e$ +/- stdev[ $N_e$ ] (years of sampling) |
|------------|-----------|------------|-----------------------------|--------------------------------|--------------------|----------------------------------------------|
| <b>A</b>   | 40.896379 | -72.892071 | 2147                        | 1.79x10 <sup>-3</sup>          | 37 (10/18/9)       | 11.47 +/- 0.11 (3)                           |
| <b>B</b>   | 40.891766 | -72.874854 | 6413                        | 2.03x10 <sup>-3</sup>          | 20 (0/10/10)       | 39.54 +/- 0.69 (2)                           |
| <b>C</b>   | 40.889497 | -72.866932 | 1706                        | 2.05x10 <sup>-3</sup>          | 10 (0/0/10)        | 14.03 +/- 0.26 (1)                           |
| <b>D</b>   | 40.891043 | -72.863908 | 2039                        | 1.93x10 <sup>-3</sup>          | 9 (0/0/9)          | 19.25 +/- 0.75 (1)                           |
| <b>E</b>   | 40.915705 | -72.849554 | 2493                        | 2.01x10 <sup>-3</sup>          | 28 (10/9/9)        | 27.57 +/- 0.36 (3)                           |
| <b>F</b>   | 40.908597 | -72.845109 | 2898                        | 2.06x10 <sup>-3</sup>          | 20 (10/0/10)       | 31.62 +/- 0.56 (2)                           |
| <b>G</b>   | 40.914317 | -72.842938 | 2094                        | 1.97x10 <sup>-3</sup>          | 10 (0/0/10)        | 17.98 +/- 0.43 (1)                           |
| <b>H</b>   | 40.912580 | -72.826168 | 1840                        | 2.13x10 <sup>-3</sup>          | 28 (10/10/8)       | 92.36 +/- 1.38 (3)                           |
| <b>I</b>   | 40.893704 | -72.823658 | 944                         | 2.14x10 <sup>-3</sup>          | 5 (3/2/0)          | Inf (2)                                      |
| <b>J</b>   | 40.893182 | -72.823465 | 3418                        | 2.11x10 <sup>-3</sup>          | 30 (10/10/10)      | 27.28 +/- 0.58 (3)                           |
| <b>K</b>   | 40.906296 | -72.820671 | 10773                       | 2.09x10 <sup>-3</sup>          | 29 (10/8/11)       | 138.20 +/- 3.37 (3)                          |
| <b>L</b>   | 40.907237 | -72.787736 | 8587                        | 2.50x10 <sup>-3</sup>          | 1 (1/0/0)          | Inf (1)                                      |
| <b>M</b>   | 40.913165 | -72.787206 | 7020                        | 2.05x10 <sup>-3</sup>          | 8 (0/8/0)          | 75.31 +/- 4.77 (1)                           |
| <b>N</b>   | 40.910430 | -72.779946 | 464                         | 1.97x10 <sup>-3</sup>          | 10 (10/0/0)        | 9.91 +/- 0.25 (1)                            |
| <b>O</b>   | 40.924112 | -72.780170 | 4710                        | 2.06x10 <sup>-3</sup>          | 15 (10/5/0)        | 63.92 +/- 2.44 (2)                           |
| <b>P</b>   | 40.913681 | -72.758595 | 4854                        | 2.01x10 <sup>-3</sup>          | 17 (10/0/7)        | 38.59 +/- 0.87 (2)                           |
| <b>Q</b>   | 40.883585 | -72.708374 | 1302                        | 1.82x10 <sup>-3</sup>          | 5 (0/0/5)          | Inf (1)                                      |
| <b>All</b> | NA        | NA         | NA                          | 2.11x10 <sup>-3</sup>          | 282 (94/80/108)    | 85.07 +/- 1.49 (3)                           |

| Pond | A            | B            | C            | D            | E            | F            | G            | H            | I            | J            | K            | L            | M     | N     | O     | P     | Q     |
|------|--------------|--------------|--------------|--------------|--------------|--------------|--------------|--------------|--------------|--------------|--------------|--------------|-------|-------|-------|-------|-------|
| A    | *            | 3.798        | 4.035        | 3.838        | 1.127        | 2.789        | 1.740        | 3.118        | 3.683        | 3.683        | 3.283        | 3.283        | 3.118 | 3.283 | 3.118 | 3.283 | 6.191 |
| B    | 0.126        | *            | 0.000        | 0.000        | 1.000        | 0.000        | 1.000        | 0.329        | 0.310        | 0.310        | 0.494        | 0.494        | 0.494 | 0.494 | 0.329 | 0.494 | 2.818 |
| C    | 0.131        | 0.019        | *            | 0.000        | 1.000        | 0.000        | 1.000        | 0.329        | 0.310        | 0.310        | 0.494        | 0.494        | 0.494 | 0.494 | 0.494 | 0.494 | 2.818 |
| D    | 0.128        | 0.030        | <b>0.022</b> | *            | 1.000        | 0.000        | 1.000        | 0.329        | 0.310        | 0.310        | 0.494        | 0.494        | 0.494 | 0.494 | 0.494 | 0.494 | 2.818 |
| E    | 0.147        | 0.067        | 0.069        | 0.071        | *            | 1.000        | 0.000        | 1.329        | 1.425        | 1.425        | 1.329        | 1.329        | 1.284 | 1.329 | 1.284 | 1.284 | 3.905 |
| F    | 0.119        | 0.043        | 0.045        | 0.049        | 0.040        | *            | 1.000        | 0.329        | 0.310        | 0.310        | 0.329        | 0.329        | 0.329 | 0.329 | 0.329 | 0.329 | 2.905 |
| G    | 0.173        | 0.086        | 0.087        | 0.091        | 0.050        | 0.060        | *            | 1.329        | 1.425        | 1.425        | 1.329        | 1.329        | 1.329 | 1.329 | 1.284 | 1.329 | 3.905 |
| H    | 0.116        | 0.038        | 0.040        | 0.042        | 0.051        | 0.022        | 0.064        | *            | 0.262        | 0.262        | 0.000        | 0.000        | 0.000 | 0.000 | 0.000 | 0.000 | 2.577 |
| I    | 0.139        | 0.051        | 0.062        | 0.061        | 0.068        | 0.035        | 0.087        | 0.036        | *            | 0.000        | 0.262        | 0.262        | 0.262 | 0.262 | 0.262 | 0.262 | 2.508 |
| J    | 0.121        | 0.048        | 0.051        | 0.046        | 0.055        | 0.030        | 0.078        | 0.026        | 0.023        | *            | 0.262        | 0.262        | 0.262 | 0.262 | 0.262 | 0.262 | 2.508 |
| K    | 0.112        | 0.036        | 0.039        | 0.040        | 0.046        | 0.018        | 0.060        | 0.005        | 0.033        | 0.020        | *            | 0.000        | 0.000 | 0.000 | 0.000 | 0.000 | 2.577 |
| L    | <b>0.163</b> | <b>0.073</b> | <b>0.064</b> | <b>0.101</b> | <b>0.072</b> | <b>0.040</b> | <b>0.112</b> | <b>0.020</b> | <b>0.046</b> | <b>0.042</b> | <b>0.026</b> | *            | 0.000 | 0.000 | 0.000 | 0.000 | 2.481 |
| M    | 0.152        | 0.067        | 0.070        | 0.080        | 0.073        | 0.047        | 0.095        | 0.038        | 0.057        | 0.052        | 0.039        | <b>0.031</b> | *     | 0.000 | 0.000 | 0.000 | 2.485 |
| N    | 0.175        | 0.090        | 0.101        | 0.105        | 0.102        | 0.083        | 0.125        | 0.066        | 0.088        | 0.075        | 0.065        | <b>0.070</b> | 0.067 | *     | 0.000 | 0.000 | 2.485 |
| O    | 0.128        | 0.044        | 0.049        | 0.056        | 0.055        | 0.030        | 0.076        | 0.022        | 0.038        | 0.033        | 0.019        | <b>0.034</b> | 0.032 | 0.061 | *     | 0.000 | 3.382 |
| P    | 0.135        | 0.062        | 0.063        | 0.070        | 0.066        | 0.042        | 0.091        | 0.039        | 0.052        | 0.044        | 0.037        | <b>0.033</b> | 0.054 | 0.077 | 0.031 | *     | 3.382 |
| Q    | 0.210        | 0.129        | 0.142        | 0.146        | 0.138        | 0.118        | 0.164        | 0.112        | <b>0.136</b> | 0.115        | 0.108        | <b>0.159</b> | 0.133 | 0.151 | 0.112 | 0.117 | *     |

**Table 2:** Pairwise Fst values between ponds (lower diagonal) and cumulative annual average daily traffic (AADT) distances between ponds (upper diagonal—in units of New York State Route 25 traffic equivalents). Bolded Fst values are not significant ( $p >$  Benjamini-Yekutieli-corrected 0.05).

## References

- Alexander, D. H., Novembre, J., & Lange, K. (2009). Fast model-based estimation of ancestry in unrelated individuals. *Genome Research*, (19), 1655–1664. doi:10.1101/gr.094052.109
- Anderson, C. D., Epperson, B. K., Fortin, M.-J., Holderegger, R., James, P. M. A., Rosenberg, M. S., ... Spear, S. (2010). Considering spatial and temporal scale in landscape-genetic studies of gene flow. *Molecular Ecology*, 19(17), 3565–3575. doi:10.1111/j.1365-294X.2010.04757.x
- Bankevich, A., Nurk, S., Antipov, D., Gurevich, A. A., Dvorkin, M., Kulikov, A. S., ... others. (2012). SPAdes: a new genome assembly algorithm and its applications to single-cell sequencing. *Journal of Computational Biology*, 19(5), 455–477.
- Benjamini, Y., & Yekutieli, D. (2001). The control of the false discovery rate in multiple testing under dependency. *The Annals of Statistics*, 29(4), 1165–1188. doi:10.1214/aos/1013699998
- Bishop, S. C. (1941). *The salamanders of New York*. University of the State of New York.
- Blaustein, A. R., Wake, D. B., & Sousa, W. P. (1994). Amphibian Declines: Judging Stability, Persistence, and Susceptibility of Populations to Local and Global Extinctions. *Conservation Biology*, 8(1), 60–71.
- Bradburd, G. S., Ralph, P. L., & Coop, G. M. (2013). Disentangling the effects of geographic and ecological isolation on genetic differentiation. *Evolution*, 67(11), 3258–3273.
- Camacho, C., Coulouris, G., Avagyan, V., Ma, N., Papadopoulos, J., Bealer, K., & Madden, T. L. (2009). BLAST+: architecture and applications. *BMC Bioinformatics*, 10(1), 421. doi:10.1186/1471-2105-10-421
- Church, S. A., Kraus, J. M., Mitchell, J. C., Church, D. R., & Taylor, D. R. (2003). Evidence for Multiple Pleistocene Refugia in the Postglacial Expansion of the Eastern Tiger Salamander, *Ambystoma Tigrinum Tigrinum*. *Evolution*, 57(2), 372–383. doi:10.1111/j.0014-3820.2003.tb00271.x
- Danecek, P., Auton, A., Abecasis, G., Albers, C. A., Banks, E., DePristo, M. A., ... others. (2011). The variant call format and VCFtools. *Bioinformatics*, 27(15), 2156–2158.
- DePristo, M. A., Banks, E., Poplin, R. E., Garimella, K. V., Maguire, J. R., Hartl, C., ... Daly, M. J. (2011). A framework for variation discovery and genotyping using next-generation DNA sequencing data. *Nature Genetics*, 43(5), 491–498. doi:10.1038/ng.806
- Do, C., Waples, R. S., Peel, D., Macbeth, G. M., Tillett, B. J., & Ovenden, J. R. (2014). NeEstimator v2: re-implementation of software for the estimation of contemporary effective population size ( $N_e$ ) from genetic data. *Molecular Ecology Resources*, 14(1), 209–214.
- Excoffier, L., & Lischer, H. E. L. (2010). Arlequin suite ver 3.5: a new series of programs to perform population genetics analyses under Linux and Windows. *Molecular Ecology Resources*, 10(3), 564–567. doi:10.1111/j.1755-0998.2010.02847.x
- Felsenstein, J. (2006). Accuracy of Coalescent Likelihood Estimates: Do We Need More Sites, More Sequences, or More Loci? *Molecular Biology and Evolution*, 23(3), 691–700. doi:10.1093/molbev/msj079
- Frankham, R., Ballou, J. D., Ralls, K., Dudash, M. R., Fenster, C. B., & Sunnucks, P. (2017). *Genetic Management of Fragmented Animal and Plant Populations*. Oxford University Press.

- Gibbs, J. P., & Shriver, W. G. (2005). Can road mortality limit populations of pool-breeding amphibians? *Wetlands Ecology and Management*, 13(3), 281–289. doi:10.1007/s11273-004-7522-9
- Glasbey, C., van der Heijden, G., Toh, V. F. K., & Gray, A. (2007). Colour displays for categorical images. *Color Research & Application*, 32(4), 304–309. doi:10.1002/col.20327
- Glenn, T. C., Nilsen, R., Kieran, T. J., Finger, J. W., Pierson, T. W., Bentley, K. E., ... Faircloth, B. C. (2016). Adapterama I: Universal stubs and primers for thousands of dual-indexed Illumina libraries (iTru & iNext). *BioRxiv*, 049114. doi:10.1101/049114
- Guillot, G., & Rousset, F. (2013). Dismantling the Mantel tests. *Methods in Ecology and Evolution*, 4(4), 336–344. doi:10.1111/2041-210x.12018
- Hill, W. G. (1981). Estimation of effective population size from data on linkage disequilibrium. *Genetics Research*, 38(03), 209–216. doi:10.1017/S0016672300020553
- Hunter, S. S., Lyon, R. T., Sarver, B. A. J., Hardwick, K., Forney, L. J., & Settles, M. L. (2015). Assembly by Reduced Complexity (ARC): a hybrid approach for targeted assembly of homologous sequences. *BioRxiv*, 014662. doi:10.1101/014662
- Jehle, R., Burke, T., & Arntzen, J. W. (2005). Delineating fine-scale genetic units in amphibians: Probing the primacy of ponds. *Conservation Genetics*, 6(2), 227–234.
- Jiang, H., Lei, R., Ding, S.-W., & Zhu, S. (2014). Skewer: a fast and accurate adapter trimmer for next-generation sequencing paired-end reads. *BMC Bioinformatics*, 15, 182. doi:10.1186/1471-2105-15-182
- Keinath, M. C., Timoshevskiy, V. A., Timoshevskaya, N. Y., Tsonis, P. A., Voss, S. R., & Smith, J. J. (2015). Initial characterization of the large genome of the salamander *Ambystoma mexicanum* using shotgun and laser capture chromosome sequencing. *Scientific Reports*, 5(16413). doi:10.1038/srep16413
- Keinath, M. C., Voss, S. R., Tsonis, P. A., & Smith, J. J. (2016). A linkage map for the Newt *Notophthalmus viridescens*: Insights in vertebrate genome and chromosome evolution. *Developmental Biology*. doi:10.1016/j.ydbio.2016.05.027
- Lampert, K. P., Rand, A. S., Mueller, U. G., & Ryan, M. J. (2003). Fine-scale genetic pattern and evidence for sex-biased dispersal in the túngara frog, *Physalaemus pustulosus*. *Molecular Ecology*, 12(12), 3325–3334. doi:10.1046/j.1365-294X.2003.02016.x
- Langmead, B., & Salzberg, S. L. (2012). Fast gapped-read alignment with Bowtie 2. *Nature Methods*, 9(4), 357–359. doi:10.1038/nmeth.1923
- Li, H. (2013). Aligning sequence reads, clone sequences and assembly contigs with BWA-MEM. *ArXiv:1303.3997 [q-Bio]*. Retrieved from <http://arxiv.org/abs/1303.3997>
- Licht, L. E., & Lowcock, L. A. (1991). Genome size and metabolic rate in salamanders. *Comparative Biochemistry and Physiology Part B: Comparative Biochemistry*, 100(1), 83–92. doi:10.1016/0305-0491(91)90089-V
- Madison, D. M., & Farrand, L. (1998). Habitat Use during Breeding and Emigration in Radio-Implanted Tiger Salamanders, *Ambystoma tigrinum*. *Copeia*, 1998(2), 402–410. doi:10.2307/1447434
- Mantel, N. (1967). The detection of disease clustering and a generalized regression approach. *Cancer Research*, 27(2 Part 1), 209–220.
- McCartney-Melstad, E., Gidiş, M., & Shaffer, H. B. (2017). Population Genomics of the Foothill Yellow-Legged Frog (*Rana boylei*) and RADseq Parameter Choice for Large-Genome Organisms. *BioRxiv*, 186635. doi:10.1101/186635



- McCartney-Melstad, E., Mount, G. G., & Shaffer, H. B. (2016). Exon capture optimization in amphibians with large genomes. *Molecular Ecology Resources*, *16*(5), 1084–1094. doi:10.1111/1755-0998.12538
- McCartney-Melstad, E., & Shaffer, H. B. (2015). Amphibian molecular ecology and how it has informed conservation. *Molecular Ecology*, *24*(20), 5084–5109. doi:10.1111/mec.13391
- McKenna, A., Hanna, M., Banks, E., Sivachenko, A., Cibulskis, K., Kernytzky, A., ... others. (2010). The Genome Analysis Toolkit: a MapReduce framework for analyzing next-generation DNA sequencing data. *Genome Research*, *20*(9), 1297–1303.
- New York State Department of Environmental Conservation. (2015). Eastern tiger salamander fact sheet. Available <http://www.dec.ny.gov/animals/7143.html>. (Accessed September, 2016).
- Newman, C. E., & Austin, C. C. (2016). Sequence capture and next-generation sequencing of ultraconserved elements in a large-genome salamander. *Molecular Ecology*, In press. doi:10.1111/mec.13909
- Newman, R. A., & Squire, T. (2001). Microsatellite variation and fine-scale population structure in the wood frog (*Rana sylvatica*). *Molecular Ecology*, *10*(5), 1087–1100. doi:10.1046/j.1365-294X.2001.01255.x
- Oksanen, J., Blanchet, F. G., Friendly, M., Kindt, R., Legendre, P., McGlenn, D., ... Wagner, H. (2016). The vegan package. <https://CRAN.R-Project.Org/Package=vegan>. Retrieved from <https://CRAN.R-project.org/package=vegan>
- O'Neill, E. M., Schwartz, R., Bullock, C. T., Williams, J. S., Shaffer, H. B., Aguilar-Miguel, X., ... Weisrock, D. W. (2013). Parallel tagged amplicon sequencing reveals major lineages and phylogenetic structure in the North American tiger salamander (*Ambystoma tigrinum*) species complex. *Molecular Ecology*, *22*(1), 111–129. doi:10.1111/mec.12049
- Patterson, N., Price, A. L., & Reich, D. (2006). Population structure and eigenanalysis. *PLoS Genet*, *2*(12), e190. doi:10.1371/journal.pgen.0020190
- Phillipsen, I. C., Funk, W. C., Hoffman, E. A., Mosen, K. J., & Blouin, M. S. (2011). Comparative analyses of effective population size within and among species: Ranid frogs as a case study. *Evolution*, *65*(10), 2927–2945. doi:10.1111/j.1558-5646.2011.01356.x
- Polich, R. L., Searcy, C. A., & Shaffer, H. B. (2013). Effects of tail-clipping on survivorship and growth of larval salamanders. *The Journal of Wildlife Management*, *77*(7), 1420–1425.
- Portik, D. M., Smith, L. L., & Bi, K. (2016). An evaluation of transcriptome-based exon capture for frog phylogenomics across multiple scales of divergence (Class: Amphibia, Order: Anura). *Molecular Ecology Resources*, *16*(5), 1069–1083. doi:10.1111/1755-0998.12541
- Raj, A., Stephens, M., & Pritchard, J. K. (2014). fastSTRUCTURE: Variational Inference of Population Structure in Large SNP Data Sets. *Genetics*, *197*(2), 573–589. doi:10.1534/genetics.114.164350
- Reyes-Valdés, M. H. (2013). Informativeness of Microsatellite Markers. In S. K. Kantartzi (Ed.), *Microsatellites* (pp. 259–270). Humana Press. doi:10.1007/978-1-62703-389-3\_18
- Rohland, N., & Reich, D. (2012). Cost-effective, high-throughput DNA sequencing libraries for multiplexed target capture. *Genome Research*, *22*(5), 939–946. doi:10.1101/gr.128124.111
- Romiguier, J., Gayral, P., Ballenghien, M., Bernard, A., Cahais, V., Chenuil, A., ... Galtier, N. (2014). Comparative population genomics in animals uncovers the determinants of genetic diversity. *Nature*, *515*(7526), nature13685. doi:10.1038/nature13685

- Sambrook, J., & Russell, D. W. (2001). *Molecular cloning: a laboratory manual (3-volume set)* (Vol. 999). Cold Spring Harbor, New York: Cold Spring Harbor Laboratory Press.
- Santure, A. W., Stapley, J., Ball, A. D., Birkhead, T. R., Burke, T., & Slate, J. (2010). On the use of large marker panels to estimate inbreeding and relatedness: empirical and simulation studies of a pedigreed zebra finch population typed at 771 SNPs. *Molecular Ecology*, *19*(7), 1439–1451. doi:10.1111/j.1365-294X.2010.04554.x
- Savage, W. K., Fremier, A. K., & Bradley Shaffer, H. (2010). Landscape genetics of alpine Sierra Nevada salamanders reveal extreme population subdivision in space and time. *Molecular Ecology*, *19*(16), 3301–3314. doi:10.1111/j.1365-294X.2010.04718.x
- Schmeller, D. S., & Merilä, J. (2007). Demographic and genetic estimates of effective population and breeding size in the amphibian *Rana temporaria*. *Conservation Biology*, *21*(1), 142–151.
- Shaffer, H. B., Gidiş, M., McCartney-Melstad, E., Neal, K. M., Oyamaguchi, H. M., Tellez, M., & Toffelmier, E. M. (2015). Conservation Genetics and Genomics of Amphibians and Reptiles. *Annual Review of Animal Biosciences*, *3*(1). doi:10.1146/annurev-animal-022114-110920
- Shaffer, H. B., & McKnight, M. L. (1996). The Polytypic Species Revisited: Genetic Differentiation and Molecular Phylogenetics of the Tiger Salamander *Ambystoma tigrinum* (Amphibia: Caudata) Complex. *Evolution*, *50*(1), 417–433. doi:10.2307/2410811
- Slatkin, M. (1993). Isolation by Distance in Equilibrium and Non-Equilibrium Populations. *Evolution*, *47*(1), 264–279. doi:10.2307/2410134
- Stewart, M. M., & Rossi, J. (1981). The Albany Pine Bush: a northern outpost for southern species of amphibians and reptiles in New York. *American Midland Naturalist*, 282–292.
- Titus, V. R., Bell, R. C., Becker, C. G., & Zamudio, K. R. (2014). Connectivity and gene flow among Eastern Tiger Salamander (*Ambystoma tigrinum*) populations in highly modified anthropogenic landscapes. *Conservation Genetics*, *15*(6), 1447–1462. doi:10.1007/s10592-014-0629-5
- Towns, J., Cockerill, T., Dahan, M., Foster, I., Gaither, K., Grimshaw, A., ... Wilkins-Diehr, N. (2014). XSEDE: Accelerating Scientific Discovery. *Computing in Science & Engineering*, *16*(5), 62–74. doi:10.1109/MCSE.2014.80
- Trenham, P. C., Shaffer, H. B., Koenig, W. D., & Stromberg, M. R. (2000). Life history and demographic variation in the California tiger salamander (*Ambystoma californiense*). *Copeia*, *2000*(2), 365–377.
- Van der Auwera, G. A., Carneiro, M. O., Hartl, C., Poplin, R., Del Angel, G., Levy-Moonshine, A., ... DePristo, M. A. (2013). From FastQ data to high confidence variant calls: the Genome Analysis Toolkit best practices pipeline. *Current Protocols in Bioinformatics / Editorial Board, Andreas D. Baxevanis ... [et Al.]*, *43*, 11.10.1-33. doi:10.1002/0471250953.bi1110s43
- Voss, S. R., Kump, D. K., Putta, S., Pauly, N., Reynolds, A., Henry, R. J., ... Smith, J. J. (2011). Origin of amphibian and avian chromosomes by fission, fusion, and retention of ancestral chromosomes. *Genome Research*, *21*(8), 1306–1312. doi:10.1101/gr.116491.110
- Wang, I. J. (2009). Fine-scale population structure in a desert amphibian: landscape genetics of the black toad (*Bufo exsul*). *Molecular Ecology*, *18*(18), 3847–3856. doi:10.1111/j.1365-294X.2009.04338.x

- Wang, I. J. (2012). Environmental and topographic variables shape genetic structure and effective population sizes in the endangered Yosemite toad. *Diversity and Distributions*, *18*(10), 1033–1041. doi:10.1111/j.1472-4642.2012.00897.x
- Wang, I. J., Johnson, J. R., Johnson, B. B., & Shaffer, H. B. (2011). Effective population size is strongly correlated with breeding pond size in the endangered California tiger salamander, *Ambystoma californiense*. *Conservation Genetics*, *12*(4), 911–920. doi:10.1007/s10592-011-0194-0
- Wang, I. J., Savage, W. K., & Shaffer, H. B. (2009). Landscape genetics and least-cost path analysis reveal unexpected dispersal routes in the California tiger salamander (*Ambystoma californiense*). *Molecular Ecology*, *18*(7), 1365–1374. doi:10.1111/j.1365-294X.2009.04122.x
- Wang, I. J., & Shaffer, H. B. (2017). Population genetic and field-ecological analyses return similar estimates of dispersal over space and time in an endangered amphibian. *Evolutionary Applications*, *10*(6), 630–639.
- Wang, J. (2009). A new method for estimating effective population sizes from a single sample of multilocus genotypes. *Molecular Ecology*, *18*(10), 2148–2164. doi:10.1111/j.1365-294X.2009.04175.x
- Waples, R. K., Larson, W. A., & Waples, R. S. (2016). Estimating contemporary effective population size in non-model species using linkage disequilibrium across thousands of loci. *Heredity*, *117*(4), 233–240. doi:10.1038/hdy.2016.60
- Waples, R. S., Antao, T., & Luikart, G. (2014). Effects of Overlapping Generations on Linkage Disequilibrium Estimates of Effective Population Size. *Genetics*, *197*(2), 769–780. doi:10.1534/genetics.114.164822
- Waples, R. S., & Do, C. (2010). Linkage disequilibrium estimates of contemporary  $N_e$  using highly variable genetic markers: a largely untapped resource for applied conservation and evolution. *Evolutionary Applications*, *3*(3), 244–262. doi:10.1111/j.1752-4571.2009.00104.x
- Watterson, G. A. (1984). Allele frequencies after a bottleneck. *Theoretical Population Biology*, *26*(3), 387–407. doi:10.1016/0040-5809(84)90042-X
- Wigginton, J. E., Cutler, D. J., & Abecasis, G. R. (2005). A Note on Exact Tests of Hardy-Weinberg Equilibrium. *The American Journal of Human Genetics*, *76*(5), 887–893. doi:10.1086/429864
- Wright, S. (1943). Isolation by Distance. *Genetics*, *28*(2), 114–138.
- Wyman, R. L. (1991). Multiple threats to wildlife: climate change, acid precipitation, and habitat fragmentation. In *Global Climate Change and Life on Earth* (pp. 134–155). Chapman and Hall, New York, NY, USA.
- Zamudio, K. R., & Wiczorek, A. M. (2007). Fine-scale spatial genetic structure and dispersal among spotted salamander (*Ambystoma maculatum*) breeding populations. *Molecular Ecology*, *16*(2), 257–274. doi:10.1111/j.1365-294X.2006.03139.x
- Zheng, X., Levine, D., Shen, J., Gogarten, S. M., Laurie, C., & Weir, B. S. (2012). A high-performance computing toolset for relatedness and principal component analysis of SNP data. *Bioinformatics (Oxford, England)*, *28*(24), 3326–3328. doi:10.1093/bioinformatics/bts606
